# Supplementary material for: Targeted NGS for species level phylogenomics: “made to measure” or “one size fits all”?
Source: PeerJ. 2017 Jul 25;5:e3569. doi: 10.7717/peerj.3569 (PMC5530999; doi:10.7717/peerj.3569)
Supplement: Data S3 — Table documenting markers as represented in Data S1–S4. [file peerj-05-3569-s003.xlsx]

## Sheet: Feuille1
Id	Copy ?	Number of positions Aligned without gap	Variable Position	% Variability	Predicted Length
935	SC	1486	122	8.21	3342
1023	SC	461	38	8.24	2943
1033	SC	2871	237	8.25	5718
1235	SC	649	72	11.09	3399
2244	SC	548	47	8.58	2871
2443	SC	480	45	9.38	2994
2983	SC	775	57	7.35	3006
3013	SC	500	37	7.40	3111
3192	SC	1017	184	18.09	2949
3320	SC	1416	109	7.70	3324
3969	SC	1381	121	8.76	3147
4430	SC	2814	83	2.95	2973
4430 Part1	SC
4430 Part2	SC
5684	SC	1850	221	11.95	3147
5684 Part1	SC (only 68)
5684 Part2	SC
5684 Part3	SC
5694	SC	2314	365	15.77	2847
6390	SC	945	75	7.94	3024
6574	SC	1129	93	8.24	3138
6790	SC	384	60	15.63	2853
8430	SC	2053	235	11.45	2985
8430 Part1	SC
8430 Part2	SC
8430 Part3	SC
9237	SC	1045	5	0.48	2976
10677	SC	932	64	6.87	2886
11250	SC	0	0	0.00	3789
11366	SC	1156	82	7.09	3228
11366 Part1	SC
11366 Part2	SC
11366 Part3	SC
12303	SC	875	104	11.89	3240
12504	SC	730	16	2.19	3063
12927	SC	2265	75	3.31	3273
13002	SC	708	69	9.75	3402
13147	SC	492	41	8.33	3129
13540	SC	3862	403	10.44	4572
14092	SC	765	76	9.93	3969
14197	SC	2171	187	8.61	2928
14220	SC	483	5	1.04	2976
14246	SC	708	38	5.37	3144
14589	SC	494	66	13.36	7425
14914	SC	1077	45	4.18	2913
14981	SC	720	97	13.47	5229
15058	SC	1183	97	8.20	3843
15098	SC	327	44	13.46	3075
15610	SC	2763	150	5.43	2967
15610 Part1	SC
15610 Part2	SC
15610 Part3	SC
16201	SC	1870	119	6.36	3336
16623	SC	707	56	7.92	3219
16819	SC	0	0	0.00	2517
16189_Exon0	SC
16819_Exon2	SC
16189_Exon3	SC
16189_Exon4	SC
16189_Exon5	SC
16189_Exon6	SC
16189_Exon7	SC
16189_Exon8	SC
17035	SC	849	38	4.48	3963
17213	SC	429	37	8.62	3312
17284	SC	479	63	13.15	3108
17548	SC	1054	52	4.93	3249
17624	SC	509	56	11.00	3423
17845	SC	1711	108	6.31	4272
17845 Part1	SC
17845 Part 2	SC
18014	SC	1965	184	9.36	3669
18035	SC	0	0	0.00	2223
18035_Exon0	SC
18035_Exon1	SC ?
18035_Exon2	SC
18035_Exon3	SC
18243	SC	1592	106	6.66	2886
18328	SC	972	99	10.19	3501
18438	SC	1015	38	3.74	3381
18584	SC	1148	52	4.53	2901
18861	SC	1124	130	11.57	3618
18943	SC	512	32	6.25	4863
19514	SC	911	83	9.11	2940
19529	SC	459	55	11.98	2970
19963	SC	1658	178	10.74	3618
20551	SC	331	34	10.27	3801
20594	SC	791	114	14.41	3030
20894	SC	535	76	14.21	2856
21083	SC	728	61	8.38	3261
21091	SC	1426	107	7.50	3291
21194	SC	1109	125	11.27	4494
21752	SC	562	9	1.60	3321
21989	SC	655	75	11.45	3648
22130	SC	893	82	9.18	2910
22390	SC	1022	88	8.61	3702
22407	SC	337	41	12.17	4572
22519	SC	1237	67	5.42	2958
22527	SC	2624	223	8.50	3696
22640	SC	402	32	7.96	3255
22821	SC	606	97	16.01	4362
22868	SC	1077	81	7.52	3417
22969	SC	4097	269	6.57	3909
22969 Part1	SC
22969 Part2	SC
22969 Part3	SC
22985	SC	4716	412	8.74	3348
22985 Part1	SC
22985 Part2	SC
22985 Part3	SC
22988	SC	647	63	9.74	3519
23011	SC	949	95	10.01	3192
23023	SC	705	58	8.23	4125
23030	SC	1539	117	7.60	5589
127465	SC	390	192	49.23	3414
127603	SC	0	0	0.00	1728
127603_Exon0	SC
127603_Exon2	SC
127603_Exon3	SC
127603_Exon4	SC
127619	SC	594	49	8.25	2892
127694	SC	983	50	5.09	3111
127704	SC	500	56	11.20	3210
127726	SC	568	46	8.10	4308
127818	SC	2459	160	2.44	3837
127818_Exon0	SC
127818_Exon1	SC
127818_Exon2	SC
127818_Exon3	SC
127818_Exon4	SC
127820	SC	700	67	9.57	3147
127820_Exon0	SC
127820_Exon1	SC
127820_Exon2	SC
127829	SC	2010	207	10.30	4695
18492	SC	3518	140	3.98	3939
20893	SC	2184	164	7.51	1313
22990	MC (SC for R)
127652	MC (SC for R)
3335	MC
3335 Paralogue	MC
3283	MC
3283 Paralogue 1	MC
3283 Paralogue 2	MC
21710	MC
15067	MC
15067 Paralogue	MC
1501	MC
1501 Paralogue	MC
11424	MC
21097	MC
23026	MC
8678	MC
21128	MC
8423	MC
8423_Exon0	MC
8423_Exon2	MC
8423_Exon3	MC
10254	MC
10254_Exon0	MC
10254_Exon1	MC
10254_Exon3	MC
10254_Exon4	MC
10254_Exon5	MC
10254_Exon7	MC
10254_Exon9	MC
10254_Exon11	MC
14259	MC
14259_Exon0	MC
14259_Exon2	MC
14259_Exon3	MC
14259_Exon4	MC
14259_Exon5	MC
14259_Exon6	MC
14259_Exon7	MC
14259_Exon8	MC
14259_Exon9	MC
14259_Exon10	MC
22275	MC
22275_Exon0	MC
22275_Exon1	MC
22275_Exon8	MC
22448	MC
127541	MC
127451_Exon0	MC
127451_Exon1	MC
13320	MC
16234	MC
17271	MC
14977	MC
22512	MC
22981	MC
127804	MC
22474	MC
127801	MC
20960	MC
21897	MC
9820	MC
10556	MC
11697	MC
20334	MC
21123	MC
15067	MC
12183	MC
12184	MC
127753	MC
20939	MC
12573	MC
2254	MC
